# Supplementary material
Source: PubMed Central journal article supplement (PMC3427096)
Supplement: 1202882109_st01.pdf [file 1202882109_st01.pdf]

Table S1: Sequences of preneoplastic *Myc:Igh* translocation sites from tissue culture

| Clone Designation      | Sequence                                                                                                                     | Tg/End          | Polymorphic residues |
|------------------------|------------------------------------------------------------------------------------------------------------------------------|-----------------|----------------------|
| der15.3.1 <sup>†</sup> | 16,555 - 578* 1,419,586 - 562* (S $\mu$ )<br>TCCTGTGCTTTTGACACCTTTCTCA CTCAGCCCAGCTCAGCTCACTCCAG                             | Tg <sup>†</sup> | (6/6)                |
| 18.10                  | 16,842 - 818 1,421,882 - 858 (S $\mu$ )<br>AATCCCTTCTCCAAAGACCTCAGGA GCTGAGCTGAGCTGGGGTGAGCTGA                               | Tg              | (11/12)              |
| 11.9                   | 16,504 - 479 1,421,792 - 814 (S $\mu$ )<br>ACACAGGGAAAGACCACCAGATCTG G TGAGCTGAGCTGTGCTGGAGTGA                               | Tg              | (13/13)              |
| 12.1                   | 15,085 - 061 (S $\mu$ , 21 bp inversion <sup>§</sup> , then 1,421,832)<br>GTGGTGTGGAGGCGGCTTTTCCCC CAGCTCATCCAGCTTACCCAGCT   | Tg              | (9/9)                |
| 10.1                   | 16,694 - 670 1,421,922-946 (S $\mu$ )<br>CCTCCCGGTTTGACCCCTCAAAGGA GGTGAGCTGAGCTGAGCTGGGGTGAG                                | Tg              | (4/4)                |
| 2.3                    | 16,798 - 822 1,416,707 - 682 (S $\mu$ )<br>TCGCTTCGTGGTGGCCAAAGAAAGC CCTAGGAACCACTTAAGAGTAAAAGC                              | End             | (5/5)                |
| 8.1                    | ca. 15,133 <sup>§</sup> ca. 1,416,040                                                                                        | End             | (9/9)                |
| 23-89-m1               | ca. 16,471 <sup>¶</sup> ca. 1,557,000 (S $\gamma$ 2a)                                                                        | Tg              | (18/18)              |
| 10.2                   | 16,885 - 861 1,422,474 - 498 (S $\mu$ )<br>AGTCAGAAACTACGGAGCCTTCTCG GGCCTGGTTGAGATGGTTCGAGATG                               | Tg              | (3/3)                |
| 15.5                   | 16,915 - 891 1,421,516 - 540 (S $\mu$ )<br>GAAATTTAAATGCCCTCTCAGAGAC CTGAGCTGAGCTGGGTGAGCTGAGC                               | Tg              | (31/31)              |
| 36.2                   | 16,905 - 881 1,419,010 - 034 (S $\mu$ )<br>TGCCCTCTCAGAGACTGGTAAGTCA TGGACTGTTCTGAGCTGAGATGAGC                               | Tg              | (>31/31)             |
| 37.3                   | 16,796 - 772 1,419,079 - 055 (S $\mu$ , 152 bp inversion <sup>§</sup> )<br>ACCACGAAGCGACCTCCCGTTTGA GCTCACCCAGCTCAGCTCACCCCA | Tg              | (3/3)                |
| 4.1                    | 16,913 - 889 1,422,115 - 139 (S $\mu$ )<br>AATTTAAATGCCCTCTCAGAGACTG AACTGAGCTGTGTGAGCTGAGCTGG                               | End             | (4/4)                |
| 12.4                   | 15,085 - 061 1,419,559 - 535 (S $\mu$ , 36 bp inversion <sup>§</sup> )<br>GTGGTGTGGAGGCGGCTTTTCCCC CAGCTCAGCTCACCCAGCTCATCC  | Tg              | (51/52)              |
| 6.3                    | 17,095 - 071 1,421,631 - 655 (S $\mu$ )<br>AGCCCAACATCAAGTCCTAGTGCCG TGAGCTGGGCTGAGCTGGGCTGAGC                               | Tg              | (16/19)              |
| 2.9                    | 16,896 - 872 1,421,898 - 922 (S $\mu$ )<br>AGAGACTGGTAAGTCAGAGTCTACG CTGGGGTGAGCTGAGCTGAGCTGGG                               | Tg              | (7/7)                |
| 21.10                  | 16,208 - 184 1,421,908 - 932 (S $\mu$ )<br>GGCGGCAGGCTCGGAGGCAAAGCCC CTGAGCTGAGCTGGGGTGAGCTGAG                               | Tg              | (8/8)                |

<sup>†</sup> AC153008.4 is the Genbank accession number for the 25 bp of the *Myc* part of the translocation (left) and AJ851868.3 is the GenBank accession number for the *Igh* part (strain 129) of the translocation (right). Residue numbers from these accessions are shown above each sequence. The S region of origin is also shown above the sequence of the *Igh* part. For comparison to the endogenous *Igh* (C57BL/6) sequence, accession NT\_166318.1 was used. A vertical line in each sequence notes the translocation site. Nucleotides between vertical lines represent insertions. Nucleotides that are underlined are shared between the *Igh* and *Myc* or *Pvt1* sequences.

Table 1 (continued)

<sup>†</sup>der 15.3.1, 18.10, etc. are the laboratory designations of the cloned translocation sequence. The first seven sequences are from transgenic line 995 B cells, "23-89-m1" is from transgenic line 820 B cells, and the last nine sequences are from transgenic line 556 B cells. The full sequences are available in GenBank, accessions JX080033-JX080049.

<sup>‡</sup>The transgenic (Tg) or endogenous (End) origin of the *Igh* sequence was determined by the examination of all potential polymorphic residues in the sequence. In the right-most column the number of residues that matched the "Tg" or "End" designation/number of polymorphic residues examined is shown in parentheses.

<sup>§</sup>In these translocation site sequences, there was a 21, 36, or 152 bp inversion of S $\mu$  sequences at the exact translocation site, followed by S $\mu$  in the orientation dictated by the PCR primers.

<sup>¶</sup>We did not determine the exact translocation site location by accurate sequences, as the translocation site was far removed from the sequencing primer. However, the residues shown are within 100 bp of the actual translocation site, and the S $\mu$  sequences near the sequencing primer allowed unambiguous designation of transgenic or endogenous sequences.
