# Supplementary material
Source: PubMed Central journal article supplement (PMC3427096)
Supplement: 1202882109_st02.pdf [file 1202882109_st02.pdf]

Table S2: Sequences of *Myc:Igh* translocation sites from tumors

| Tumor | Sequence*                                                                                                                        | Tg/End          | Polymorphic residues  |
|-------|----------------------------------------------------------------------------------------------------------------------------------|-----------------|-----------------------|
| 4816  | 16,905 - 881   1,419,010 - 034 (S $\mu$ )<br>TGCCCTCTCAGAGACTGGTAAGTCA   TGGACTGTTTCTGAGCTGAGATGAGC                              | Tg              | (24/24 <sup>†</sup> ) |
| 74219 | 23,286,370 - 394 <sup>‡</sup>   1,586,911 - 935 (S $\alpha$ )<br>TGACGGTTGATCAGTGACAATGTAG   TGAGCTGAGCTAAACTAGGCTGAAA           | Tg <sup>§</sup> |                       |
| 74163 | 23,288,305 - 329 <sup>‡</sup>   1,418,724 - 700 (S $\mu$ <sup>¶</sup> )<br>TTCTGAAAACAGGAATATGTGCAAG   CAAGCTTTATGAGTCTGGCCTTCTC | Tg <sup>§</sup> |                       |
| 79130 | 15,709 - 684   1,537,648 - 672 (S $\gamma$ 2b)<br>TACTCCGGCTCCGGGGTGTAACAG   AGCACTGGGCCTTCCAGAATAAT                             | Tg <sup>§</sup> |                       |
| 79130 | 15,283 - 314   1,555,377 - 357 (S $\gamma$ 2a)<br>TACGTGGCAGTGAGTTGCTGAGTAA   CCCAGATTCCCATAGCTGCTCTGC                           | Tg <sup>§</sup> |                       |
| 79134 | 23,295,296 - 6,018 <sup>‡</sup>   1,509,641 - 618 (S $\gamma$ 1)<br>CTTCTTCCAGGCTAATTCATATTT   G   TTATCACAGGGCTCAGCTGCCTT       | Tg <sup>§</sup> |                       |
| 1854  | 16,786 - 762   1,587,313 - 337 (S $\alpha$ )<br>GACCTCCCGGTTTGACCCCTCAAAG   CTGAGCTGGGCCTAAGATGGACTTG                            | Tg <sup>§</sup> |                       |
| 1854  | 16,340 - 364   1,416,532 - 508 (S $\mu$ )<br>CCCAGGCTCCGGGGAGGGAATTTT   CTCCTTCCAACAAATGAAGTTTAA                                 | Tg <sup>§</sup> |                       |

\*The organization of this Table is identical to Table S1. Relevant GenBank accession numbers are listed in the footnotes to Table S1. Tumor 4816 was derived from transgenic line 995. Tumors 74219 and 74163 were derived from transgenic line 820. Tumors 79130 and 79134 were derived from transgenic line 336. Tumor 1854 was derived from transgenic line 556. These sequences are available in GenBank, accessions JX080050-JX080057.

<sup>†</sup>The alignment of the S $\mu$  part of the translocation from the tumor in mouse 4816 required two deletions relative to the germline sequences. The first was at residue 1,419,156 and was 90 bp for the 129 sequence and 105 bp for the C57BL/6 sequence. The second deletion was at residue 1,419,441 and was 2145 bp for the 129 sequence and 145 bp for the C57BL/6 sequence. These putative deletions resulted in the best alignments for both 129 and C57BL/6.

<sup>‡</sup>Chr 15 sequence (*Pvt1*) is from accession NT\_039621.7. Consistent with the sequence of the translocation site, *Pvt1*-Ca transcripts (1) were amplified from the RNA of tumor #74219 and #79134. *Pvt1*-Ca transcripts were also cloned from the RNA of tumor #74163.

<sup>§</sup>These tumors were derived from mice with an endogenous *Igh*<sup>a</sup> allele, and therefore the origin of the *Igh* part of the translocation cannot be determined from sequence polymorphisms. The "Tg" designation is derived from two-color FISH.

<sup>¶</sup>213 bp of S $\mu$  (the 3' end of the S $\mu$  sequence is joined to 5' end of the *Pvt1* sequence) is followed by 84 bp of S $\gamma$ 1 sequence (the 3' end of the S $\gamma$ 1 sequence is joined to the 5' of end of the S $\mu$  sequence). The S $\gamma$ 1 sequence is followed by S $\alpha$  sequences (joined to S $\gamma$ 1 5' to 5'). The orientation of the S $\mu$  and S $\gamma$ 1 sequences relative to one another and to the S $\alpha$  sequences suggest that the S $\mu$  and S $\gamma$ 1 sequences are derived from a switch deletion circle.

1. Huppi K, Siwarski D (1994) Chimeric transcripts with an open reading frame are generated as a result of translocation to the *Pvt1* region in mouse B-cell tumors. *Int. J. Cancer* 15:648-651.
