# Supplementary material
Source: PubMed Central journal article supplement (PMC3427096)
Supplement: 1202882109_st03.pdf [file 1202882109_st03.pdf]

Table S3: PCR primers for cloning transgene insertion sites and *Myc:Igh* translocation sites.

| <u>Purpose</u>  | <u>5'/3'</u> | <u>Sequence</u>                | <u>Location</u>           | <u>Other</u>             |
|-----------------|--------------|--------------------------------|---------------------------|--------------------------|
| Cloning         | 5'           | AAGCCAAACTACCCTGGTGCC          | BAC vector                |                          |
| Transgene       | 3'           | CATTAATTGCGTTGCGCTCACTGC       | BAC vector                |                          |
| Insertion site  |              |                                |                           |                          |
| Cloning         | 5'           | GTGAAAACCGACTGTGGCCCTGGAA      | 14932-56                  | first round              |
| <i>Myc:Igh</i>  | 3'           | ACTATGCTATGGACTACTGGGGTCAAG    | 1416007-33 (S $\mu$ )     | first round              |
| head-to-head    | 5'           | GTGGAGGTGTATGGGGTGTAGAC        | 14961-83                  | second round             |
|                 | 3'           | CCTCAGTCACCGTCTCCTCAGGTA       | 1416037-60 (S $\mu$ )     | second round             |
|                 | 5'           | GGGGAGGGGGTGTCAAATAATAAGA      | 17395-71                  | tumor #79130 der (14;15) |
|                 | 3'           | GGAGGGAAGATGAAGACGGATGGT       | 1560298-275 (Sy2b)        | tumor #79130 der (14;15) |
| Cloning         | 5'           | GGGGAGGGGGTGTCAAATAATAAGA      | 17395-71                  | first round              |
| <i>Myc:Igh</i>  | 3'           | TGAGGACCAGAGAGGGATAAAAGAGAA    | 1423540-14 (S $\mu$ )     | first round              |
| tail-to-tail    | 3'           | CGGTTTGTGTTGAGAATGTCAGCGG      | 1558331-308 (Sy2a)        | first round              |
|                 | 3'           | CGTGAATCAGGCAGCCGATTATCAC      | 1588781-57 (S $\alpha$ )  | first round              |
|                 | 5'           | GACACCTCCCTTCTACACTCTAAACCG    | 17370-44                  | second round             |
|                 | 3'           | CACCCTGCTATTTCTTGTGCTAC        | 1423459-35 (S $\mu$ )     | second round             |
|                 | 3'           | CTCAATCAGACAACTCTCCTGG         | 1558280-259 (Sy2a)        | second round             |
|                 | 3'           | GAGCTGACCAACAGTTCTGGCTGTATAGAC | 1588548-19 (S $\alpha$ )  | second round             |
|                 | 5'           | AGATCAGACTCACCGCAGTC           | 17246-226                 | inverse cloning #4816    |
|                 | 3'           | GGTCCGTAACAGCTGCTACC           | 17251-271                 | inverse cloning #4816    |
|                 | 5'           | GTGAAAACCGACTGTGGCCCTGGAA      | 14932-56                  | tumor #79130 der (15;14) |
|                 | 3'           | CTGTGGGTTGGGAGAAGTGTAGTGT      | 1537457-481(Sy2a)         | tumor #79130 der (15;14) |
| Cloning         | 5'           | CATTACATTCTGTCCATCCAATCATC     | 23285634-56               | tumor #74219             |
| <i>Pvt1:Igh</i> | 3'           | TCTAGGTAAGCTCAGCCTTGTTTCAAG    | 1587230-06 (S $\alpha$ )  | tumor #74219             |
|                 | 5'           | ATGACTACACCCCTGAGCAGTC         | 1588432-411 (S $\alpha$ ) | inverse cloning #74219   |
|                 | 3'           | ACAGCCAGAAGTGTGGTCAGC          | 1588525-46 (S $\alpha$ )  | inverse cloning #74219   |
|                 | 5'           | TGGAGATGTGACTTCTGATC           | 23286702-23               | tumor #74163             |
|                 | 3'           | CGTGAATCAGGCAGCCGATTATCAC      | 1588781-57 (S $\alpha$ )  | tumor #74163             |

Residues numbers for *Myc* primers are from accession AC153008.4; residues for *Pvt1* primers are from accession NT\_039621.7; residues for *Igh* primers are from accession AJ851868.3.
