# Supplementary material
Source: PubMed Central journal article supplement (PMC3427096)
Supplement: 1202882109_st04.pdf [file 1202882109_st04.pdf]

Table S4: BAC probes used in this study

| <b><u>Name</u></b> | <b><u>Chromosome</u></b> | <b><u>Location</u></b>  |
|--------------------|--------------------------|-------------------------|
| RP24-388I5         | 1                        | 175,551,438-175,696,869 |
| RP24-398H12        | 4                        | 98,439,094-98,594,754   |
| RP24-221C18        | 7                        | 129,437,953-129,597,875 |
| 189A22 (Igh)       | 12                       | 114,400,224-114,510,168 |
| RP24-329N9         | 14                       | 9,118,407-9,306,395     |
| D15MIT17 (Myc)     | 15                       | 61,732,863-61,867,227   |
| RP23-96F18 (Pvt1)  | 15                       | 62,022,418-62,186,675   |
| RP24-172M11        | 17                       | 90,046,770-90,191,451   |
